# Supplementary material
Source: HighWire-hosted journal article supplement (https://jnm.snmjournals.org/highwire/filestream/95271/field_highwire_adjunct_files/0/199737_Supplemental_Data.pdf)
Supplement: 199737_Supplemental_Data.pdf [file 199737_Supplemental_Data.pdf]

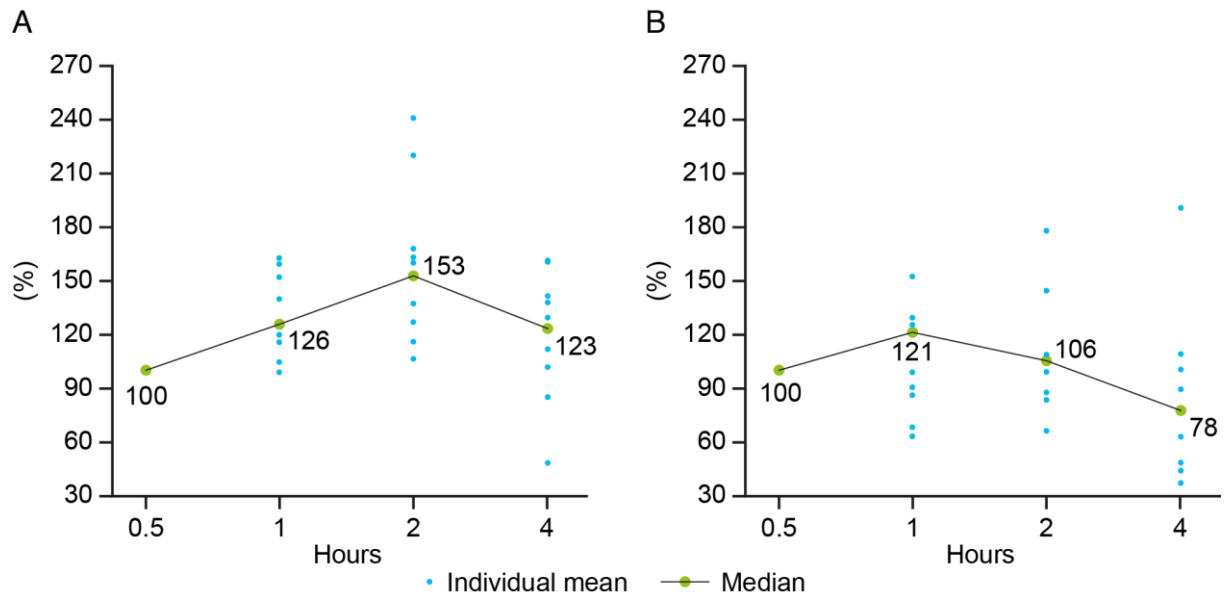

**SUPPLEMENTAL FIGURE 1.** Tumor-to-background ratios normalized to the first timepoint (0.5h) for matched lesions identified at all timepoints (liver metastases). (A) Data from on-site reader. (B) Data from central reader. Tumor-to-background ratios:  $SUV_{max}$  [tumor]/ $SUV_{max}$  [reference tissue]
